# Supplementary material for: CD36-Facilitated Fatty Acid Uptake Inhibits Leptin Production and Signaling in Adipose Tissue
Source: Oxford University Press journal article supplement (doi:10.2337/db06-1699), 2007-06-27
Supplement: db061699-sup-sequence_of_the_primers_used_for_the_quantitative_pcr_datadiabetes.doc [file db061699-sup-sequence_of_the_primers_used_for_the_quantitative_pcr_datadiabetes.doc]

**Table 1: Sequence of the primers used for the quantitative PCR data**.

| **Gene** | **Forward Primer** | **Reverse Primer** |
| --- | --- | --- |
| Adiponectin | AAGGACAAGGCCGTTCTCT | TATGGGTAGTTGCAGTCAGTTGG |
| CPT-1 | GCAAGAATGGCCTGTTAGGCCT | GGGCTGGTCCTACACTTCTTGA |
| UCP2 | TCCACGCAGCCTCTACAAT | GACCTTTACCACATCTGTAGGC |
| ACO | GTATAAACTCTTCCCGCTCCTG | CCAGGTAGTAAAAGCCTTCAGC |
| aP2 | GAACCTGGAAGCTTGTC | ACTCTTGTGGAAGTCACG |
| INSIG-1 | TGGTGGACATTTGATCGTTCCCGA | GCAGCCCTCTCTTTGGGTTT |
| Leptin | GTCCAGGATGACACCAAAACCC | TAGAGTGACGCTTCCAGGACGC |
| 18s | AGTCCCTGCCCTTTGTACACA | GATCCGAGGGCCTCACTAAAC |
| Cyclophilin | TCCAAAGACAGCAGAAAACTTTCG | TCTTCTTGCTGGTCTTGCCATTCC |
